# Supplementary material
Source: Royal Society of Chemistry journal article supplement (doi:10.1039/d6nj00127k)
Supplement: d6nj00127k1.pdf [file d6nj00127k1.pdf]

## Supplementary Information

### Enhanced the photothermal catalytic performance and stability of Ni–MOx–Al<sub>2</sub>O<sub>3</sub> (M = Ce, Pr, Y) for DRM: the role of rare earth element

Jiming Wang<sup>a</sup>, Min Ji<sup>\*a</sup> and Min Wang<sup>\*a</sup>

<sup>a</sup> School of Chemistry, Dalian University of Technology, Dalian 116024, PR China

\* Corresponding author. E-mail addresses: jimin@dlut.edu.cn, wangmin@dlut.edu.cn

#### 1 PTC-DRM experiment :

2 The PTC-DRM reaction was carried out in a fixed-bed reactor with an inner diameter of  
3 20 mm (Fig. S1). A 300 W xenon lamp was used as a concentrated solar simulator, and two  
4 long-wavelength pass filters (400 nm and 490 nm, Edmund Optics) were employed to study  
5 wavelength-dependent characteristics. The catalyst temperature reached 167 °C under 300 W  
6 irradiation without auxiliary heating (Fig. S2). A quartz reactor with a dedicated light window  
7 (upper section: 2 mm × 10 mm square quartz tube; lower section: 8 mm inner diameter circular  
8 quartz tube) was used, and a thermocouple in direct contact with the catalyst surface was  
9 connected to a temperature controller to maintain consistent temperatures under light and dark  
10 conditions.

11 Before the reaction, 0.06 g of catalyst was mixed with 0.2 g of quartz sand, reduced in H<sub>2</sub>  
12 at 700 °C for 1.5 h, and purged with N<sub>2</sub> to remove residual H<sub>2</sub>. The preheating furnace was  
13 heated to 350 °C, and upon reaching a reaction temperature of 550 °C, N<sub>2</sub> flow was replaced  
14 with a gas mixture of 30 mL·min<sup>-1</sup> CO<sub>2</sub> and 30 mL·min<sup>-1</sup> CH<sub>4</sub>. The exhaust gas composition  
15 was analyzed by gas chromatography. Thermal catalytic activity was evaluated at 550-700 °C  
16 with a gas hourly space velocity (GHSV) of 60000 mL·g<sup>-1</sup>·h<sup>-1</sup>. Stability tests were conducted at  
17 650 °C under light and dark conditions. The conversion efficiencies of CH<sub>4</sub> and CO<sub>2</sub> and the  
18 H<sub>2</sub>/CO ratio were calculated using the following formulas :

$$19 \quad CH_4 \text{ conversion } (\%) = \frac{F_{CH_4,in} - F_{CH_4,out}}{F_{CH_4,in}} \times 100\% \quad (1)$$

$$20 \quad CO_2 \text{ conversion } (\%) = \frac{F_{CO_2,in} - F_{CO_2,out}}{F_{CO_2,in}} \times 100\% \quad (2)$$

$$H_2/CO = \frac{F_{out} \cdot C_{out.H_2}}{F_{out} \cdot C_{out.CO}} \times 100\% \quad (3)$$

$$TOF(S^{-1}) = \frac{X \times M_{Ni}}{V_m \times m_{cat} \times m_{Ni} \times D_{Ni}} \times 100\% \quad (4)$$

$$D_{Ni}(\%) = \frac{2 \times H_2 uptake \times 10^{-6} \times M_{Ni} \times \delta}{m_{Ni}} \times 100\% \quad (5)$$

Where,  $F_{in}$  and  $F_{out}$  are the inlet and outlet volume flows of each component at standard temperature and pressure.  $M_{Ni}$  represents the molar mass of Ni ( $58.7 \text{ g} \cdot \text{mol}^{-1}$ ),  $m_{Ni}$  is the actual Ni loading,  $V_m$  is the standard molar volume of gas ( $22.4 \text{ L} \cdot \text{mol}^{-1}$ ),  $m_{cat}$  is the mass of the catalyst used for testing the TOF value (mg) and  $D_{Ni}$  represents the dispersion of the active metal Ni. X refers to the conversion rates of methane and carbon dioxide.  $H_2$  uptake was quantitatively measured by  $H_2$ -TPD.  $\delta$  is the chemical adsorption's chemical stoichiometric factor for the Ni/H mole ratio (1).

### Kinetic studies

The kinetic experiment was conducted at temperatures ranging from 470 to 530°C, utilizing a GHSV of  $144000 \text{ ml} \cdot \text{g} \cdot \text{cat}^{-1} \cdot \text{h}^{-1}$ . This approach was chosen to minimize the influence of external mass transfer limitations and facilitate achieving lower reactant conversion rates. The catalytic activities, as well as their corresponding  $TOF_{CH_4}$  and  $TOF_{CO_2}$  values, have been comprehensively summarized in Table S1. Furthermore, the linear relationship between  $\ln(TOF)$  and  $1/T$  is clearly depicted in Fig. 5(c)(d). The specific calculation process is carried out with reference to the research of Li et al. [1]

$$TOF(s^{-1}) = \frac{X_{CH_4} \times M_{Ni}}{V_m \times m_{cat} \times m_{Ni} \times D_{Ni}} \times 100\% \quad (1)$$

Where,  $M_{Ni}$  was the molar mass of Ni,  $m_{Ni}$  was the actual loading capacity of Ni,  $V_m$  was the standard molar volume,  $D_{Ni}$  was the active metal dispersion, and  $m_{cat}$  was the mass of the catalyst used to test the TOF value.

$$r_{CH_4} = k_{CH_4} \cdot P_{CH_4}^\alpha \cdot P_{CO_2}^\beta \quad (2)$$

$$r_{CO_2} = k_{CO_2} \cdot P_{CH_4}^\alpha \cdot P_{CO_2}^\beta \quad (3)$$

45 Where  $r_{\text{CH}_4}$  and  $r_{\text{CO}_2}$  were the reaction rates for  $\text{CH}_4$  and  $\text{CO}_2$ ,  $k_{\text{CH}_4}$  and  $k_{\text{CO}_2}$  were the rate  
46 constants for  $\text{CH}_4$  and  $\text{CO}_2$ ,  $\alpha$  and  $\beta$  were the order of the reactions for  $\text{CH}_4$  and  $\text{CO}_2$ ,  
47 respectively.

48 The Arrhenius equation could be used to express  $k_{\text{CH}_4}$  and  $k_{\text{CO}_2}$  as follows:

$$49 \quad k_{\text{CH}_4} = A_{\text{CH}_4} \cdot e^{\frac{-E_{\text{aCH}_4}}{RT}} \quad (4)$$

$$50 \quad k_{\text{CO}_2} = A_{\text{CO}_2} \cdot e^{\frac{-E_{\text{aCO}_2}}{RT}} \quad (5)$$

51 Where  $A_{\text{CH}_4}$  and  $A_{\text{CO}_2}$  were the preexponential factor for  $\text{CH}_4$  and  $\text{CO}_2$ ,  $E_{\text{aCH}_4}$  and  $E_{\text{aCO}_2}$   
52 were the activation energy for  $\text{CH}_4$  and  $\text{CO}_2$  respectively.<sup>[1]</sup>

53 Alternatively,  $r_{\text{CH}_4}$  and  $r_{\text{CO}_2}$  can be estimated through a combination of experimental data  
54 and  $\text{H}_2$ -chemisorption measurements. In particular, the turnover frequencies (TOF) can serve  
55 as substitutes for  $r_{\text{CH}_4}$  and  $r_{\text{CO}_2}$ . According to the Arrhenius equation,  $\text{Ln}(\text{TOF}) = -E_{\text{a}}/RT + C$ ,  
56 the slope of the linear relationship between  $\text{Ln}(\text{TOF})$  and  $1/T$  is proportional to the activation  
57 energy divided by the gas constant (R). This analysis allows us to determine the activation  
58 energies for methane ( $E_{\text{aCH}_4}$ ) and carbon dioxide ( $E_{\text{aCO}_2}$ ) for Ni-Al, Ni-Ce-Al, Ni-Y-Al and Ni-Pr-  
59 Al.

60 A method for determining the carbon gasification rate by using  $\text{CO}_2$  oxidation of deposited  
61 carbon over spent catalysts was used as follows, which was based on a modified Wigner–  
62 Polanyi equation (often used to generate kinetic data for TPD process).<sup>[2]</sup> As only small amount  
63 of surface carbon was identified on spent catalysts, and most of which can be gasified by  $\text{CO}_2$   
64 via reverse Boudouard reaction (reaction 6) to CO, by assuming that the reverse reaction and  
65 re-adsorption are negligible, the following gasification kinetic law (Eq. (7)) applies to the  $\text{CO}_2$   
66 surface gasification process.<sup>[3]</sup> These conditions are satisfied under our  $\text{CO}_2$ -excessive  $\text{CO}_2$ -  
67 TPO conditions operating under the high flow rate of carrier gas (He,  $30 \text{ ml min}^{-1}$ ), and first  
68 order reaction to surface carbon concentration was identified before.<sup>[1]</sup>

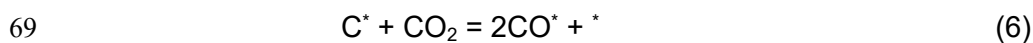

$$r = -\frac{d\theta^*}{dt} = A\theta^* \exp\left[-\frac{E_a}{RT}\right] \times P_{CO_2}^n \quad (7)$$

Where A is the pre-exponential factor,  $\theta^*$  is the surface carbon coverage,  $E_a$  is the activation energy and n is the reaction order with respect to  $CO_2$  partial pressure. R and T are the universal gas constant and temperature, respectively. To determine the kinetic parameters, A, n and  $E_a$  need to be identified by regression. All samples were outgassed to 120 °C to remove surface contaminants during post-tests handlings under  $N_2$  for 1 h, such as water. In the first series experiments, we used a tiny amount of spent catalysts (typically 10 mg) and a pure flow of  $CO_2$ , in order that the concentration variation of  $CO_2$  can be deemed as constant. The samples placed at the bottom of the Ushaped quartz tube were investigated by heating the samples from 30 °C to 800 °C in  $CO_2$  (100 vol.%) flow (30 ml  $min^{-1}$ ) at heating rates of 5, 7.10, 15 °C  $min^{-1}$ , respectively. The  $CO_2$  consumption was monitored by a TCD. Under such circumstances, a pseudo zeroth kinetic order for  $P_{CO_2}$  applies, and  $E_a$  could therefore be measured by changing ramp of heating for  $CO_2$ -TPO,

$$r = -\frac{d\theta^*}{dt} = A\theta^* \exp\left[-\frac{E_a}{RT}\right] \times P_{CO_2}^n = AP_{CO_2}^n \theta^* \exp\left[-\frac{E_a}{RT}\right] \quad (8)$$

$AP_{CO_2}^n$  can be regarded as an invariable, for the exceedingly high partial pressure and small consumption.

During the TPO analysis, the temperature is increased linearly by:

$$T_t = T_0 + \beta t \quad (9)$$

Where  $\beta = dT/dt$  and  $T_0$  is the initial temperature. Thus:

$$-\frac{d\theta^*}{dT}\beta = AP_{CO_2}^n \theta^* \exp\left[-\frac{E_a}{RT}\right] \quad (10)$$

If  $T_M$  is the maximum temperature of a given TPO spectrum, then:

$$\frac{d}{dT}\left[\theta^* \left(\frac{AP_{CO_2}^n}{RT}\right) \exp\left(-\frac{E_a}{RT}\right)\right] = 0 \quad (11)$$

$$2\ln T_M - \ln\beta = \frac{E_a}{RT_M} + \ln\left(\frac{E_a}{AP_{CO_2}^n R}\right) \quad (12)$$

93  $2\ln T_M - \ln \beta$  vs.  $1/T_M$  curve can be used to deduce  $E_a$  from the slope.

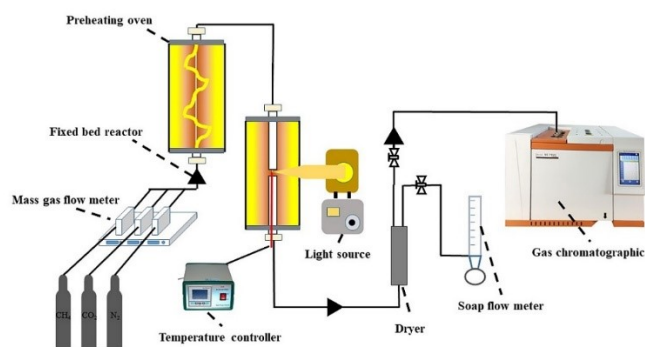

94

95

**Fig. S1** Diagram of experimental device.

96

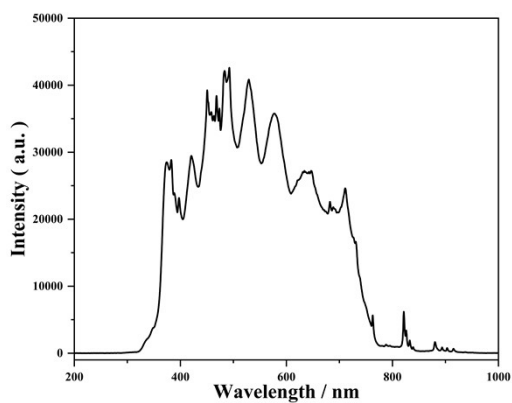

97

98

**Fig. S2** Spectrum of 300 W xenon light source intensity for PTC reaction.

99

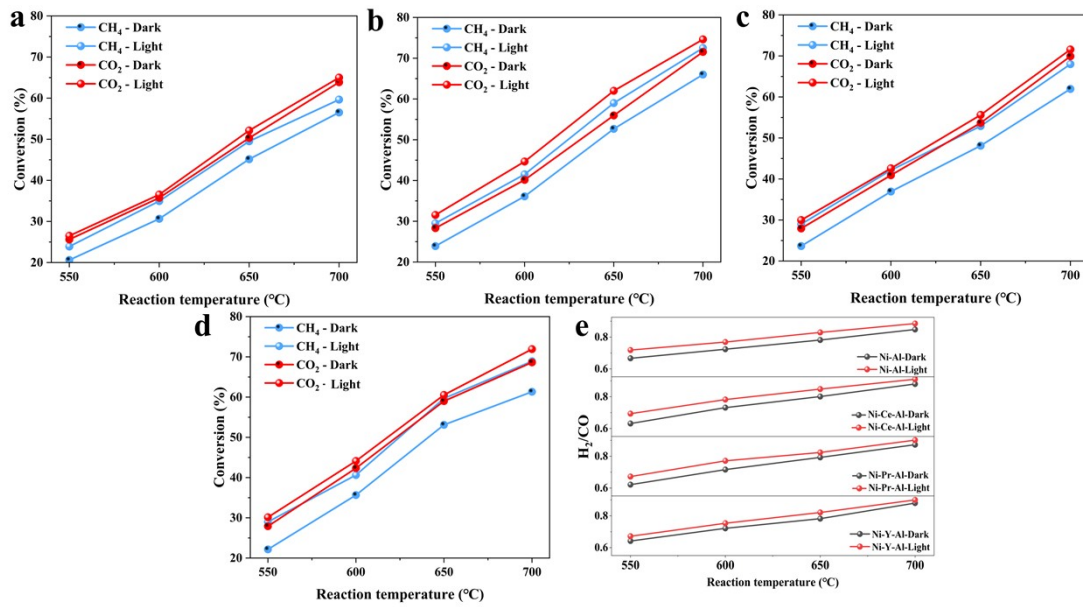

100  
101  
102  
103

**Fig. S3** PTC-DRM test of the catalysts (a) Ni-Al, (b) Ni-Ce-Al, (c) Ni-Pr-Al and (d) Ni-Y-Al catalysts, (e) H<sub>2</sub>/CO. (Reaction conditions: WHSV=60000 mL·g<sup>-1</sup>·h<sup>-1</sup>, CH<sub>4</sub> / CO<sub>2</sub>=1 / 1)

104 **Table S1** Comparison of catalyst performance with data in the literature.

| Entry | Sample                              | Operating temperature (OA);<br>Actual temperature of catalyst (AT) | Reactor type      | Conditions                                                                                                                                                                                                    | Production rates of CO and H <sub>2</sub> (PCO and PH <sub>2</sub> )                | Ref       |
|-------|-------------------------------------|--------------------------------------------------------------------|-------------------|---------------------------------------------------------------------------------------------------------------------------------------------------------------------------------------------------------------|-------------------------------------------------------------------------------------|-----------|
| 1     | 10Ni/Al <sub>2</sub> O <sub>3</sub> | OT = 550 °C<br>AT = NR                                             | Flow-type reactor | LA-251Xe lamp with a HA30 filter (UV-visible light of 300–800 nm, 1.07 W cm <sup>-2</sup> ); 50 mg sample; Total feed flow rate is 20.0 mL/min (CH <sub>4</sub> /CO <sub>2</sub> = 1:1); atmospheric pressure | PCO ≈ 6.50 μmol min <sup>-1</sup><br>PH <sub>2</sub> ≈ 6.25 μmol min <sup>-1</sup>  | 4         |
| 2     | Pt/black<br>TiO <sub>2</sub>        | OT = 550 °C<br>AT = NR                                             | Flow-type reactor | AM 1.5 G Newport solar simulator (100 mW/cm <sup>-2</sup> ); 15 mg sample; CH <sub>4</sub> /CO <sub>2</sub> mixture gas (CH <sub>4</sub> /CO <sub>2</sub> = 1.0; GHSV = 40000 mL/g <sub>cat</sub> /h)         | PCO = 39.5 μmol min <sup>-1</sup><br>PH <sub>2</sub> = 17.75 μmol min <sup>-1</sup> | 5         |
| 3     | MgO/Pt/Zn<br>-CeO <sub>2</sub>      | OT = 600 °C<br>AT = 600 °C                                         | Flow-type reactor | A concentrated solar simulator (1200 W); 5 mg sample; 10% CH <sub>4</sub> and 10% CO <sub>2</sub> ; Total feed flow rate is 14 mL/min (CH <sub>4</sub> /CO <sub>2</sub> = 1:1); 1.01 × 10 <sup>5</sup> Pa     | PCO = 43 μmol min <sup>-1</sup><br>PH <sub>2</sub> = 29.7 μmol min <sup>-1</sup>    | 6         |
| 4     | Pt-Si-CeO <sub>2</sub>              | OT = 600 °C<br>AT = 600 °C                                         | Flow-type reactor | A custom-made solar simulator (250–800 nm, 1775 mWcm <sup>-2</sup> ); 10 mg sample; Total feed flow rate is 14 mL/min (CH <sub>4</sub> /CO <sub>2</sub> = 1:1)                                                | PCO = 25.66 μmol min <sup>-1</sup><br>PH <sub>2</sub> = 15 μmol min <sup>-1</sup>   | 7         |
| 5     | Ni-Ce-Al                            | OT = 650 °C<br>AT = 650 °C                                         | Flow-type reactor | 300 W Xe-lamp; 60 mg sample; Total feed flow rate is 60.0 mL/min (CH <sub>4</sub> /CO <sub>2</sub> = 1:1); atmospheric pressure                                                                               | PCO = 26.4 μmol min <sup>-1</sup><br>PH <sub>2</sub> = 22.4 μmol min <sup>-1</sup>  | This work |

106 **Table S2.** TOF<sub>CH<sub>4</sub></sub> and TOF<sub>CO<sub>2</sub></sub> of Ni-Al, Ni-Ce-Al, Ni-Pr-Al and Ni-Y-Al catalysts

| Temperature (°C) |          |                                                  | 470                                              | 490                            | 510                | 530                |                    |
|------------------|----------|--------------------------------------------------|--------------------------------------------------|--------------------------------|--------------------|--------------------|--------------------|
| Ni-Al            | Dark     | TOF <sub>CH<sub>4</sub></sub> (s <sup>-1</sup> ) | 0.2077<br>(4.91%) <sup>a</sup>                   | 0.2601<br>(6.15%) <sup>b</sup> | 0.3219<br>(7.61%)  | 0.3997<br>(9.45%)  |                    |
|                  |          | TOF <sub>CO<sub>2</sub></sub> (s <sup>-1</sup> ) | 0.3011<br>(7.12%)                                | 0.3565<br>(8.43%)              | 0.4331<br>(10.24%) | 0.5223<br>(12.35%) |                    |
|                  | Light    | TOF <sub>CH<sub>4</sub></sub> (s <sup>-1</sup> ) | 0.2939<br>(6.95%)                                | 0.3578<br>(8.46%)              | 0.4272<br>(10.10%) | 0.5143<br>(12.16%) |                    |
|                  |          | TOF <sub>CO<sub>2</sub></sub> (s <sup>-1</sup> ) | 0.3176<br>(7.51%)                                | 0.3828<br>(9.05%)              | 0.4542<br>(10.74%) | 0.5443<br>(12.87%) |                    |
|                  | Ni-Ce-Al | Dark                                             | TOF <sub>CH<sub>4</sub></sub> (s <sup>-1</sup> ) | 0.2073<br>(6.25%)              | 0.2424<br>(7.31%)  | 0.3170<br>(9.56%)  | 0.3751<br>(11.31%) |
|                  |          |                                                  | TOF <sub>CO<sub>2</sub></sub> (s <sup>-1</sup> ) | 0.2723<br>(8.21%)              | 0.3290<br>(9.92%)  | 0.3983<br>(12.01%) | 0.4616<br>(13.92%) |
| Light            |          | TOF <sub>CH<sub>4</sub></sub> (s <sup>-1</sup> ) | 0.2905<br>(8.76%)                                | 0.3618<br>(10.91%)             | 0.3979<br>(12.00%) | 0.4862<br>(14.66%) |                    |
|                  |          | TOF <sub>CO<sub>2</sub></sub> (s <sup>-1</sup> ) | 0.3403<br>(10.26%)                               | 0.4092<br>(12.34%)             | 0.4752<br>(14.33%) | 0.5359<br>(16.16%) |                    |
| Ni-Pr-Al         |          | Dark                                             | TOF <sub>CH<sub>4</sub></sub> (s <sup>-1</sup> ) | 0.1207<br>(5.30%)              | 0.1526<br>(6.70%)  | 0.1801<br>(7.91%)  | 0.2273<br>(9.98%)  |
|                  |          |                                                  | TOF <sub>CO<sub>2</sub></sub> (s <sup>-1</sup> ) | 0.1690<br>(7.42%)              | 0.2022<br>(8.88%)  | 0.2455<br>(10.78%) | 0.2959<br>(12.99%) |
|                  | Light    | TOF <sub>CH<sub>4</sub></sub> (s <sup>-1</sup> ) | 0.1626<br>(7.14%)                                | 0.2034<br>(8.93%)              | 0.2451<br>(10.76%) | 0.2847<br>(12.50%) |                    |
|                  |          | TOF <sub>CO<sub>2</sub></sub> (s <sup>-1</sup> ) | 0.1781<br>(7.82%)                                | 0.2132<br>(9.36%)              | 0.2505<br>(11.00%) | 0.3106<br>(13.64%) |                    |
|                  | Ni-Y-Al  | Dark                                             | TOF <sub>CH<sub>4</sub></sub> (s <sup>-1</sup> ) | 0.1614<br>(6.01%)              | 0.1880<br>(7.00%)  | 0.2450<br>(9.12%)  | 0.2912<br>(10.84%) |
|                  |          |                                                  | TOF <sub>CO<sub>2</sub></sub> (s <sup>-1</sup> ) | 0.2165<br>(8.06%)              | 0.2595<br>(9.66%)  | 0.3140<br>(11.69%) | 0.3675<br>(13.68%) |
| Light            |          | TOF <sub>CH<sub>4</sub></sub> (s <sup>-1</sup> ) | 0.2219<br>(8.26%)                                | 0.2595<br>(9.66%)              | 0.3267<br>(12.16%) | 0.3788<br>(14.10%) |                    |
|                  |          | TOF <sub>CO<sub>2</sub></sub> (s <sup>-1</sup> ) | 0.2418<br>(9.00%)                                | 0.2797<br>(10.41%)             | 0.3441<br>(12.81%) | 0.3979<br>(14.81%) |                    |

107 <sup>a</sup> CH<sub>4</sub> conversion at different temperatures108 <sup>b</sup> CO<sub>2</sub> conversion at different temperatures

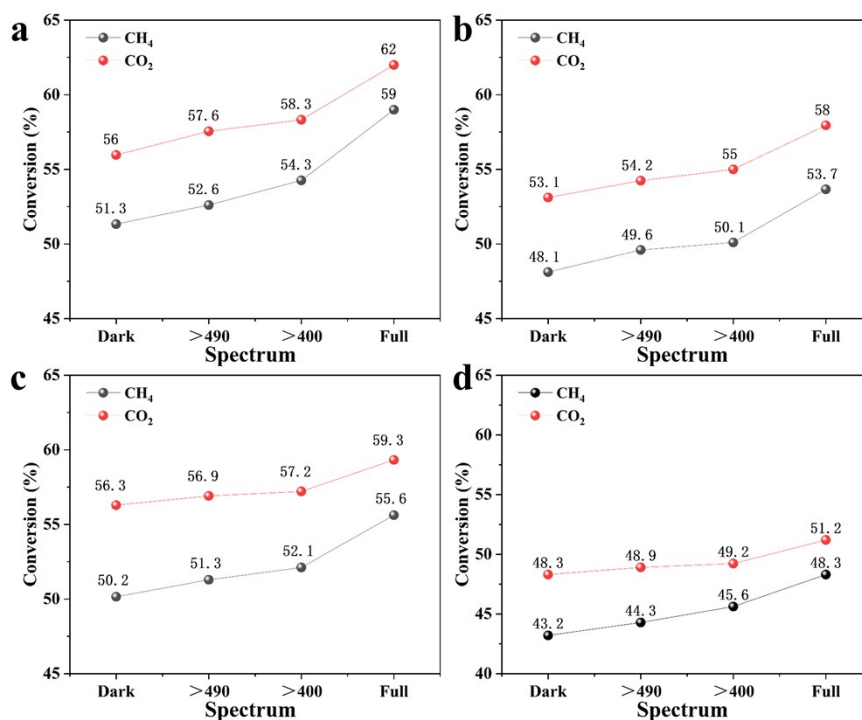

109

110 **Fig. S4** Effect of different wavelengths of light source at 650 °C on the catalytic performance  
 111 of (a) Ni-Ce-Al, (b) Ni-Pr-Al, (c) Ni-Y-Al and (d) Ni-Al (Reaction conditions:WHSV=60000  
 112  $\text{mL} \cdot \text{g}^{-1} \cdot \text{h}^{-1}$ ,  $\text{CH}_4 / \text{CO}_2 = 1 / 1$ )  
 113

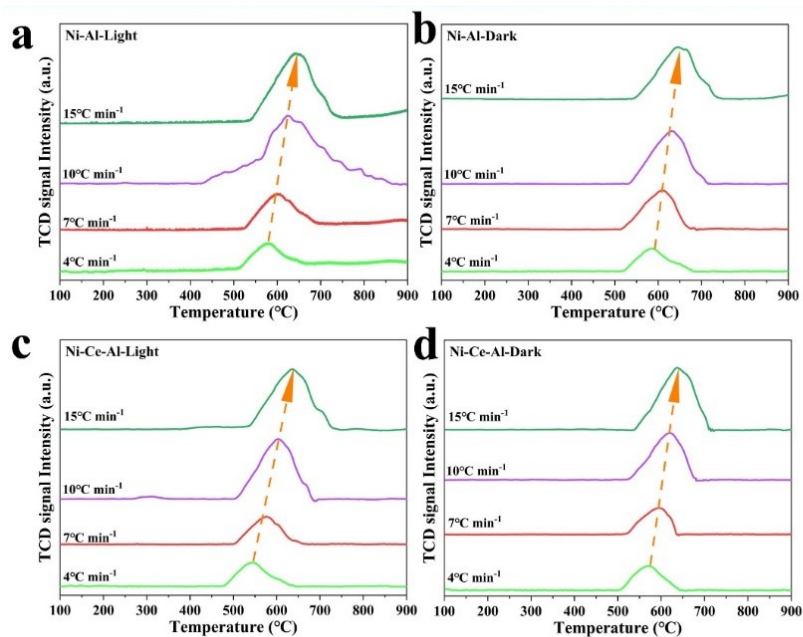

114

115 **Fig. S5**  $\text{CO}_2$ -TPO patterns for Ni-Al and Ni-Ce-Al with manipulated rates of 4, 7, 10, 15  
 116  $^\circ\text{C} \text{ min}^{-1}$  from 100 °C to 900 °C in  $\text{CO}_2$  (100 vol.%) flow ( $30 \text{ mL min}^{-1}$ )

117

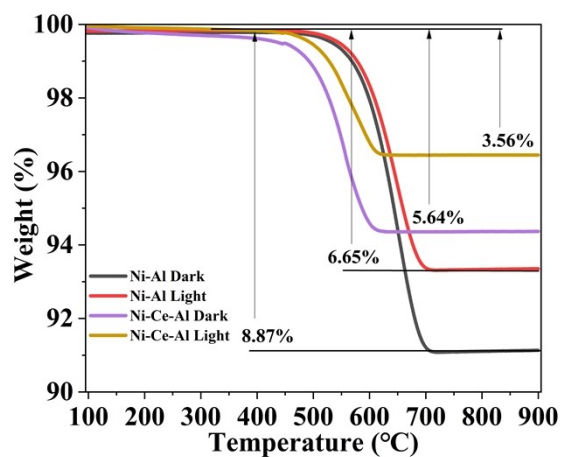

118

119

**Fig. S6** Thermogravimetric curves of Ni-Ce-Al, and Ni-Al catalysts after thermal catalytic and photothermal catalytic reactions.

120

121

## 122 References

123 1 Li B, Yuan X, Li B, Wang X. *Fuel*. **2021**, 301, 121027.

124 2 H. Zhou, T. Zhang, Z. Sui, Y.-A. Zhu, C. Han, K. Zhu, X. Zhou, *Appl. Catal. B-Environ.* **2018**, 233, 143-159.

125 3 T. Osaki, *Catal. Lett.* **2015**, 145, 1931-1940.

126 4 H. Liu, T.D. Dao, L. Liu, X. Meng, T. Nagao, J. Ye, *Appl. Catal. B-Environ.* 2017, **209**, 183-189.

127 5 B. Han, W. Wei, L. Chang, P. Cheng, Y.H. Hu, *ACS Catal.* 2015, **6**, 494-497.

128 6 F. Pan, X. Xiang, Z. Du, E. Sarnello, T. Li, Y. Li, *Appl. Catal. B-Environ.* 2020, **260**, 118189.

129 7 F. Pan, X. Xiang, W. Deng, H. Zhao, X. Feng, Y. Li, *ChemCatChem* 2018, 10, 940-945.
